# Supplementary material
Source: MDPI journal article supplement (https://www.mdpi.com/2073-4441/14/23/3846)
Supplement: s1 [file s1]

Journal name: **Water**

Supplementary materials to

**Benthic habitat quality assessment in estuarine intertidal flats based on long-term data with focus on responses to eco-restoration activity**

Anguo Zhang<sup>1,a</sup>, Yanbin Gu<sup>1,a</sup>, Marco C. Brustolin<sup>3</sup>, Xiaolong Yang<sup>1</sup>, Rongliang Zhang<sup>4</sup>, Zhiwen Wang<sup>1</sup>, Honghua Shi<sup>5</sup>, Xiutang Yuan<sup>1,2,\*</sup>

<sup>1</sup> National Marine Environmental Monitoring Center, Ministry of Ecology and Environment, Dalian 116023, China

<sup>2</sup> Yantai Institute of Coastal Zone Research, Chinese Academy of Sciences, Yantai, 264003, China

<sup>3</sup> Institute of Marine Research–Havforsknings instituttet, Flødevigen Research Station, 4817 His, Norway

<sup>4</sup> Second Institute of Oceanography Ministry of Natural Resources, Hangzhou, 310000, China

<sup>5</sup> First Institute of Oceanography, Ministry of Natural Resources, Qingdao 266061, China

<sup>a</sup> These authors contributed equally to this work.

**\*Corresponding author:**

Xiutang Yuan; E-mail: xtyuan@yic.ac.cn

## Supplementary information

Table S1. List of macrobenthos species and grouping in the intertidal flats of Liaohe Estuary.

Table S2. List of undefined macrobenthos species when the references about the sensitivity of that are not found.

Table S3. Annual run off, sediment discharges and sediment concentration of Liaohe in Liujianfang hydrology station.

Table S4. One-way ANOVA results of M-AMBI and organic matter content for different sections in the intertidal flats of Liaohe Estuary from 2013 to 2020.

Table S5. One-way ANOVA results for organic matter content, median grain size, clay, sand, and silt sand of sediments in the intertidal flats of Liaohe Estuary from 2013 to 2020.

Figure S1. Spatial distribution maps of the  $H'$  values of the intertidal flats in Liaohe Estuary from 2013 to 2020

Figure S2. Spatial distribution maps of the AMBI values of the intertidal flats in Liaohe Estuary from 2013 to 2020

Figure S3. Spatial distribution maps of the M-AMBI values of the intertidal flats in Liaohe Estuary from 2013 to 2020

Table S1. List of macrobenthos species and grouping in the intertidal flats of Liaohe Estuary.

| Scientific name                  | AMBI groups | Scientific name                  | AMBI groups |
|----------------------------------|-------------|----------------------------------|-------------|
| <b>Annelida</b>                  | -           | -                                | -           |
| <i>Glycera alba</i>              | IV          | <i>Glycinde gurjanovae</i>       | II          |
| <i>Aglaophamus sinensis</i>      | II          | <i>Goniada japonica</i>          | II          |
| <i>Diopatra chiliensis</i>       | II          | <i>Goniada maculata</i>          | II          |
| <i>Glycera capitata</i>          | II          | <i>Lumbrineris latreilli</i>     | II          |
| <i>Glycera tenuis</i>            | II          | <i>Lumbrineris cruzensis</i>     | II          |
| <i>Glycera chirori</i>           | II          | <i>Lumbrineris heteropoda</i>    | II          |
| <i>Glycera rouxii</i>            | II          | <i>Lumbrineris longifolia</i>    | IV          |
| <i>Glycera onomichiensis</i>     | II          | <i>Neanthes japonica</i>         | III         |
| <i>Nectoneanthes multignatha</i> | III         | <i>Lumbrineridae</i> sp.         | II          |
| <i>Nectoneanthes oxypoda</i>     | III         | <i>Inermonephtys inermis</i>     | II          |
| <i>Nephtys oligobranchia</i>     | II          | <i>Nephtys ciliata</i>           | II          |
| <i>Nephtys californiensis</i>    | II          | <i>Hemipodus longipapillatus</i> | II          |
| <i>Nephtys caeca</i>             | II          | <i>Glycera subaenea</i>          | II          |
| <i>Nereis grubei</i>             | NA          | <i>Euclymene annandalei</i>      | I           |
| <i>Perinereis aibuhitensis</i>   | III         | <i>Euclymene lombricoides</i>    | I           |
| <i>Glyceridae</i> sp.            | II          | <i>Eulalia viridis</i>           | II          |
| <i>Aricidea fragilis</i>         | I           | <i>Ophelina acuminata</i>        | III         |
| <i>Haploscoloplos elongatus</i>  | III         | <i>Paralacydonia paradoxa</i>    | II          |
| <i>Laonice cirrata</i>           | II          | <i>Paraprionospio pinnata</i>    | IV          |
| <i>Notomastus latericeus</i>     | III         | <i>Phyllodoce malmgreni</i>      | II          |
| <i>Phyllodoce papillosa</i>      | II          | <i>Poecilochaetus serpens</i>    | I           |
| <i>Phyllodoce chinensis</i>      | II          | <i>Praxillella praetermissa</i>  | III         |
| <i>Arandia intermedia</i>        | I           | <i>Phyllodocidae</i> sp.         | II          |
| <i>Heteromastus filiformis</i>   | IV          | <i>Pseudopolydora kemp</i>       | III         |
| <i>Nereiphylla castanea</i>      | II          | <i>Scolecopsis squamata</i>      | III         |
| <i>Sthenolepis japonica</i>      | II          | <i>Marphysa bellii</i>           | II          |
| <i>Terebellides stroemii</i>     | II          | <i>Notomastus latericeus</i>     | III         |
| <i>Chaetopterus variopedatus</i> | I           | <i>Mediomastus</i> sp.           | III         |
| <b>Crustacea</b>                 | -           | -                                | -           |
| <i>Ampelisca cyclops</i>         | I           | <i>Austinogebia</i> sp.          | I           |
| <i>Byblis japonicus</i>          | I           | <i>Exopalaemon modestus</i>      | I           |
| <i>Leptochela gracilis</i>       | III         | <i>Gammaropsis nitida</i>        | I           |
| <i>Ogyrides orientalis</i>       | I           | <i>Harpiniopsis vadiculus</i>    | I           |
| <i>Crangon hakodatei</i>         | I           | <i>Nihonotrypaea harmandi</i>    | III         |
| <i>Penaeus orientalis</i>        | II          | <i>Neomysis awatschensis</i>     | II          |
| <i>Monoculodes koreanus</i>      | I           | <i>Phoxocephalus</i> sp.         | I           |
| <i>Acetes chinensis</i>          | I           | <i>Grandifoxus cuspis</i>        | I           |
| <i>Philyra pisum</i>             | II          | <i>Asthenognathus inaequipes</i> | II          |
| <i>Portunus trituberculatus</i>  | I           | <i>Helice tientsinensis</i>      | II          |
| <i>Macrophthalmus dilatatus</i>  | I           | <i>Macrophthalmus japonicus</i>  | I           |

| Scientific name                | AMBI groups | Scientific name                   | AMBI groups |
|--------------------------------|-------------|-----------------------------------|-------------|
| <i>Scopimera globosa</i>       | I           | <i>Diogenes edwardsii</i>         | II          |
| <i>Tritodynamia horvathi</i>   | II          | <i>Orithya sinica</i>             | NA          |
| <i>Hemigrapsus sinensis</i>    | II          | <i>Cirolana japonensis</i>        | II          |
| <i>Cyathura peirates</i>       | II          | <i>Diastylis tricineta</i>        | I           |
| <i>Synidotea</i> sp.           | NA          | <i>Grandidierella japonica</i>    | III         |
| <b>Mollusca</b>                | -           | -                                 | -           |
| <i>Neptunea cumingii</i>       | I           | <i>Barnca davidi</i>              | II          |
| <i>Bullacta exarata</i>        | I           | <i>Lunatia gilva</i>              | II          |
| <i>Rapana venosa</i>           | I           | <i>Nassarius festivus</i>         | II          |
| <i>Neverita didyma</i>         | I           | <i>Nassarius variciferus</i>      | II          |
| <i>Assiminea lutea</i>         | II          | <i>Nassarius semiplicatus</i>     | II          |
| <i>Cyclina sinensis</i>        | I           | <i>Cerithium sinense</i>          | II          |
| <i>Meretrix meretrix</i>       | I           | <i>Musculista senhousia</i>       | III         |
| <i>Scapharca kagoshimensis</i> | IV          | <i>Potamocorbula laevis</i>       | V           |
| <i>Mactra veneriformis</i>     | I           | <i>Mitrella bella</i>             | I           |
| <i>Moerella rutila</i>         | I           | <i>Terebra taylori</i>            | I           |
| <i>Umbonium thomasi</i>        | II          | <i>Solen strictus</i>             | I           |
| <b>Nemertea</b>                | -           | -                                 | -           |
| <i>Lineus</i> sp.              | III         | <i>Lineus fuscoviridis</i>        | III         |
| <b>Brachiopoda</b>             | -           | <b>Cnidaria</b>                   |             |
| <i>Lingula anatina</i>         | I           | <i>Anthopleura xanthogrammica</i> | II          |
| <b>Platyhelminthes</b>         |             | <b>Chordata</b>                   |             |
| <i>Discloplana gigas</i>       | NA          | <i>Gobiidae</i> sp.               | NA          |

Note: EGI, sensitive species; EGII, indifferent species; EGIII, tolerant species; EGIV, second order opportunistic species; EGV, the first order opportunistic species, NA, No assigned.

Table S2. List of undefined macrobenthos species when the references about the sensitivity of that are not found.

| Scientific name                   | Assigned AMBI groups                           |
|-----------------------------------|------------------------------------------------|
| <i>Anthopleura xanthogrammica</i> | changed by <i>Anthopleura</i> sp. (II)         |
| <i>Assiminea lutea</i>            | changed by <i>Assiminea latericea</i> (II)     |
| <i>Austinogebia</i> sp.           | changed by <i>Austinogebia wuhsienweni</i> (I) |
| <i>Barnca davidi</i>              | changed by <i>Barnea davidi</i> (I)            |
| <i>Cerithium sinense</i>          | changed by <i>Cerithium</i> sp. (II)           |
| <i>Crangon hakodatei</i>          | changed by <i>Crangon affinis</i> (I)          |
| <i>Cyathura peirates</i>          | changed by <i>Cyathura</i> sp. (III)           |
| <i>Exopalaemon modestus</i>       | changed by <i>Exopalaemon carinicauda</i> (I)  |
| <i>Glyceridae</i> sp.             | changed by GLYCERIDAE (II)                     |
| <i>Gobiidae</i> sp.               | changed by GOLFINGIIDAE (I)                    |
| <i>Grandifoxus cuspis</i>         | changed by <i>Grandifoxus grandis</i> (I)      |
| <i>Llyella gigas</i>              | no assigned                                    |
| <i>Lumbrineridae</i> sp.          | changed by <i>Lumbrinerides</i> sp. (II)       |
| <i>Monoculodes koreanus</i>       | changed by <i>Monoculodes</i> sp. (I)          |
| <i>Neptunea cumingii</i>          | changed by <i>Neptunea antiqua</i> (I)         |
| <i>Nereis grubei</i>              | changed by <i>Nereis</i> sp. (III)             |
| <i>Orithya sinica</i>             | no assigned                                    |
| <i>Penaeus orientalis</i>         | changed by <i>Penaeus indicus</i> (II)         |
| <i>Phyllodocidae</i> sp.          | changed by <i>Phyllodoce</i> sp. (II)          |
| <i>Synidotea</i> sp.              | no assigned                                    |
| <i>Terebra taylori</i>            | changed by <i>Terebra</i> sp. (II)             |

Table S3. Annual run off, sediment discharges and sediment concentration of Liaohe in Liujianfang hydrology station.

| Year | Annual run off<br>(hundred million m <sup>3</sup> ) | Annual sediment discharges<br>(Million tons) | Annual sediment<br>concentration (kg/m <sup>3</sup> ) |
|------|-----------------------------------------------------|----------------------------------------------|-------------------------------------------------------|
| 2013 | 57.2                                                | 427                                          | 0.747                                                 |
| 2014 | 23.08                                               | 87.6                                         | 0.38                                                  |
| 2015 | 9.16                                                | 15.7                                         | 0.172                                                 |
| 2016 | 26.33                                               | 109                                          | 0.413                                                 |
| 2017 | 15.93                                               | 85.7                                         | 0.538                                                 |
| 2018 | 9.373                                               | 26.9                                         | 0.287                                                 |
| 2019 | 31.08                                               | 179                                          | 0.576                                                 |
| 2020 | 32.5                                                | 156                                          | 0.48                                                  |

Table S4. One-way ANOVA results of M-AMBI and organic matter content for different sections in the intertidal flats of Liaohe Estuary from 2013 to 2020.

| Sections | M-AMBI |       |          | Organic matter content |          |
|----------|--------|-------|----------|------------------------|----------|
|          | df     | F     | <i>P</i> | F                      | <i>P</i> |
| A        | 63     | 5.047 | 0.000    | 4.182                  | 0.008    |
| B        | 39     | 1.882 | 0.106    | 2.182                  | 0.155    |
| C        | 47     | 1.039 | 0.420    | 2.405                  | 0.069    |
| D        | 47     | 2.461 | 0.034    | 13.226                 | 0.001    |
| E        | 71     | 0.434 | 0.877    | 0.175                  | 0.987    |
| F        | 55     | 1.169 | 0.338    | 1.328                  | 0.291    |
| G        | 39     | 1.244 | 0.309    | 1.890                  | 0.138    |

Table S5. One-way ANOVA results for organic matter content, median grain size, clay, sand, and silt sand of sediments in the intertidal flats of Liaohe Estuary from 2013 to 2020.

| Sediment factors       | df  | F     | <i>P</i> |
|------------------------|-----|-------|----------|
| Organic matter content | 327 | 2.938 | 0.008    |
| Median grain size      | 327 | 0.416 | 0.892    |
| Sand                   | 327 | 0.865 | 0.534    |
| Silt sand              | 327 | 0.571 | 0.779    |
| Clay                   | 327 | 6.013 | 0.000    |

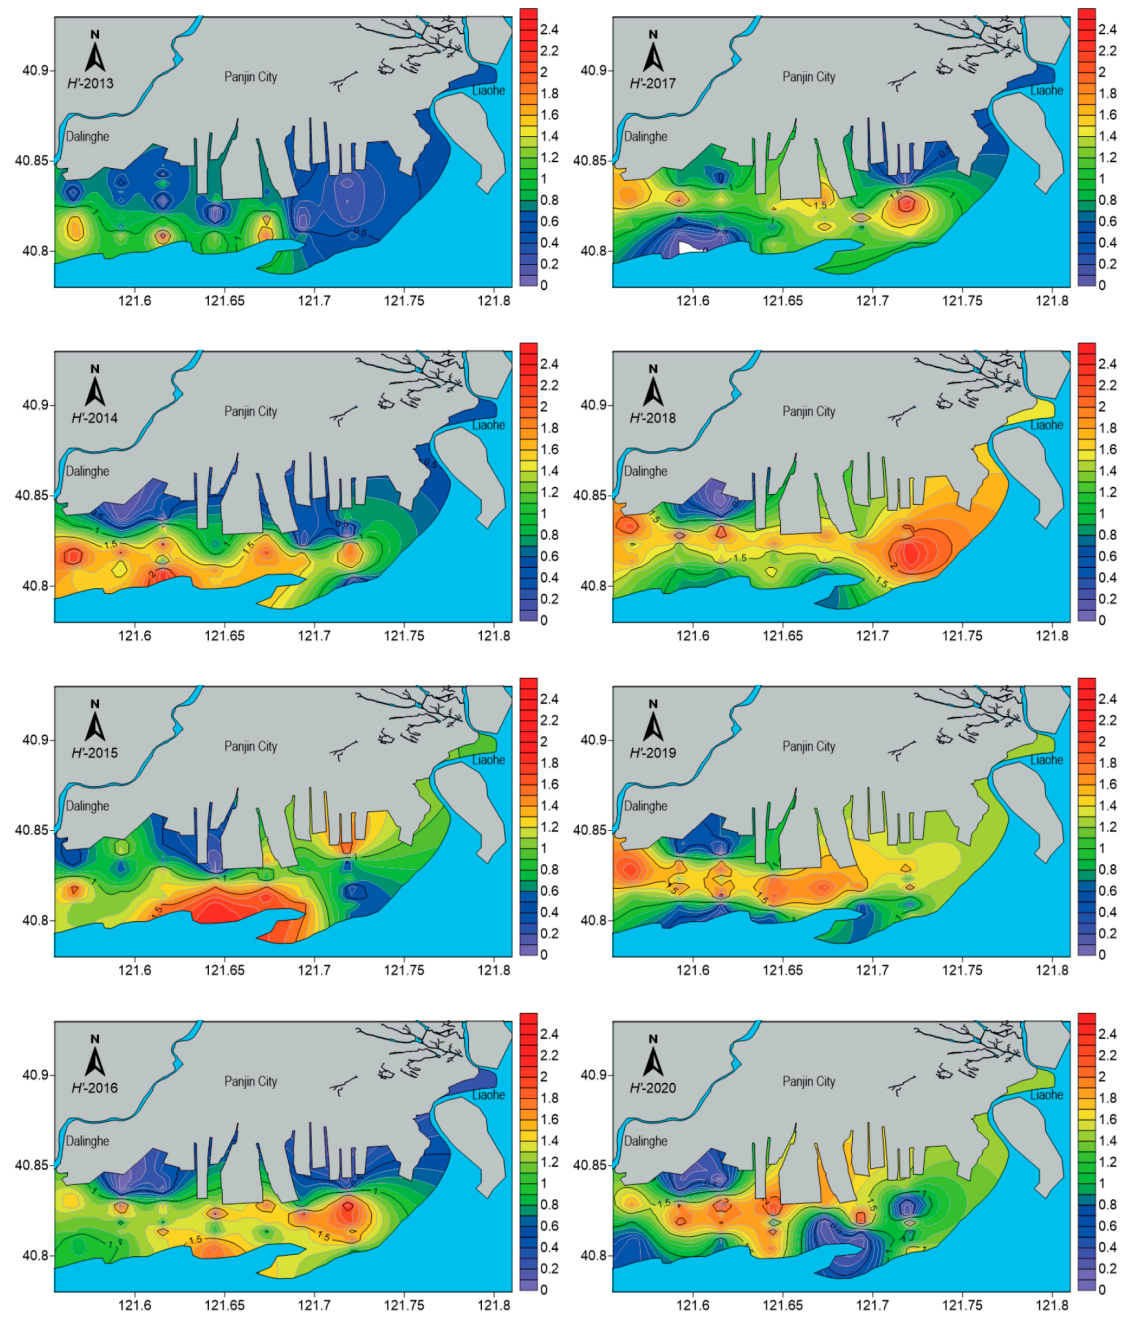

Figure S1 Spatial distribution maps of the  $H'$  values of the intertidal flats in Liaohu Estuary from 2013 to 2020

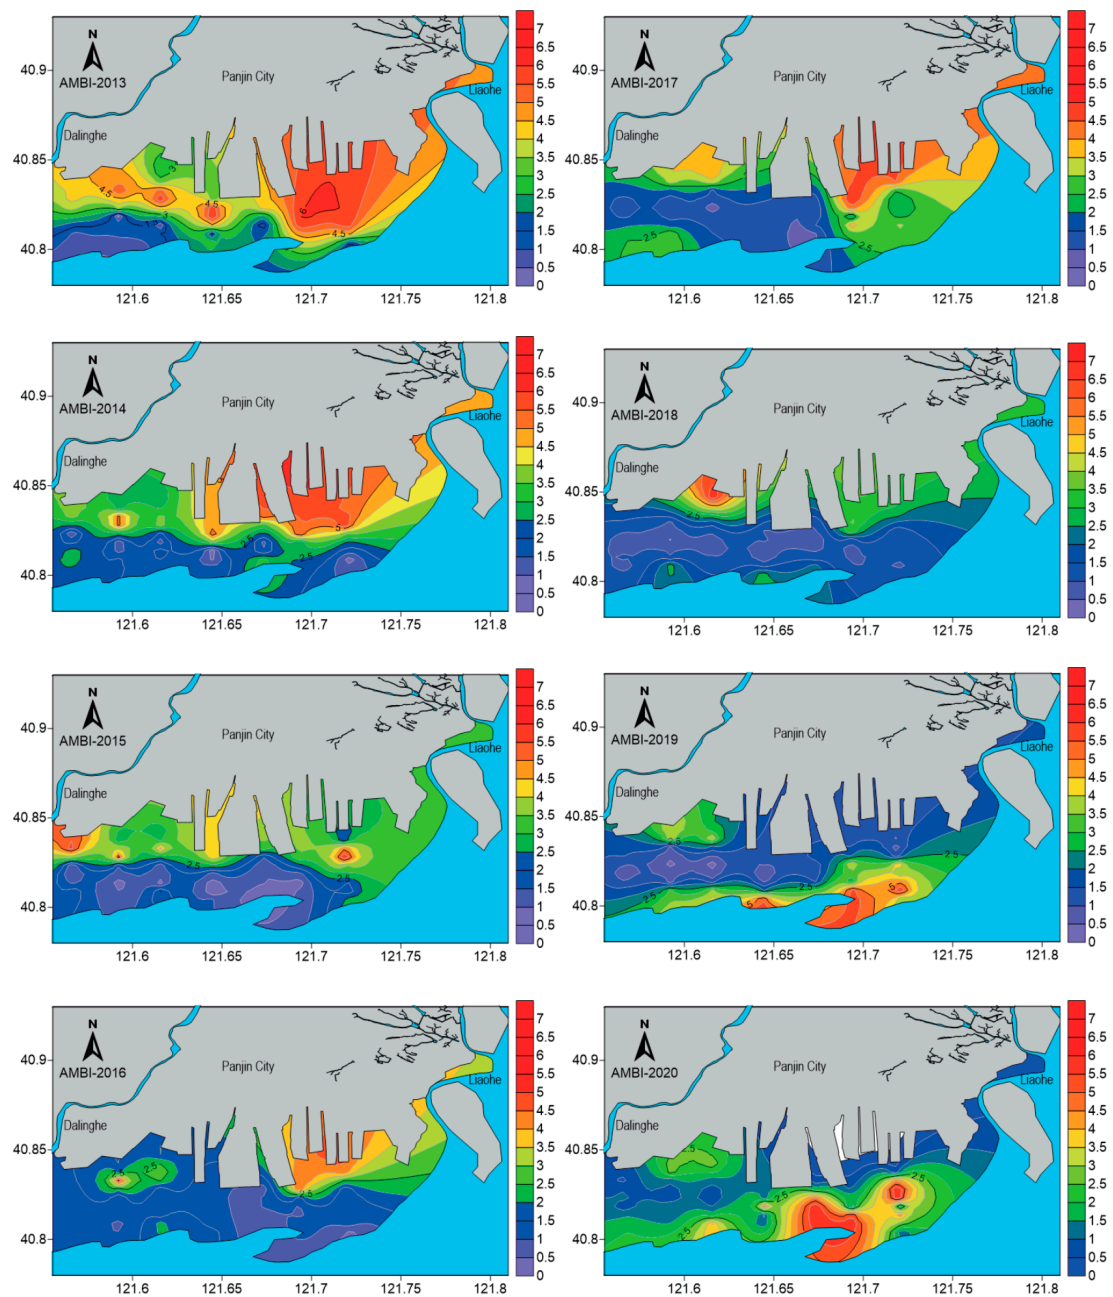

Figure S2 Spatial distribution maps of the AMBI values of the intertidal flats in Liaohu Estuary from 2013 to 2020



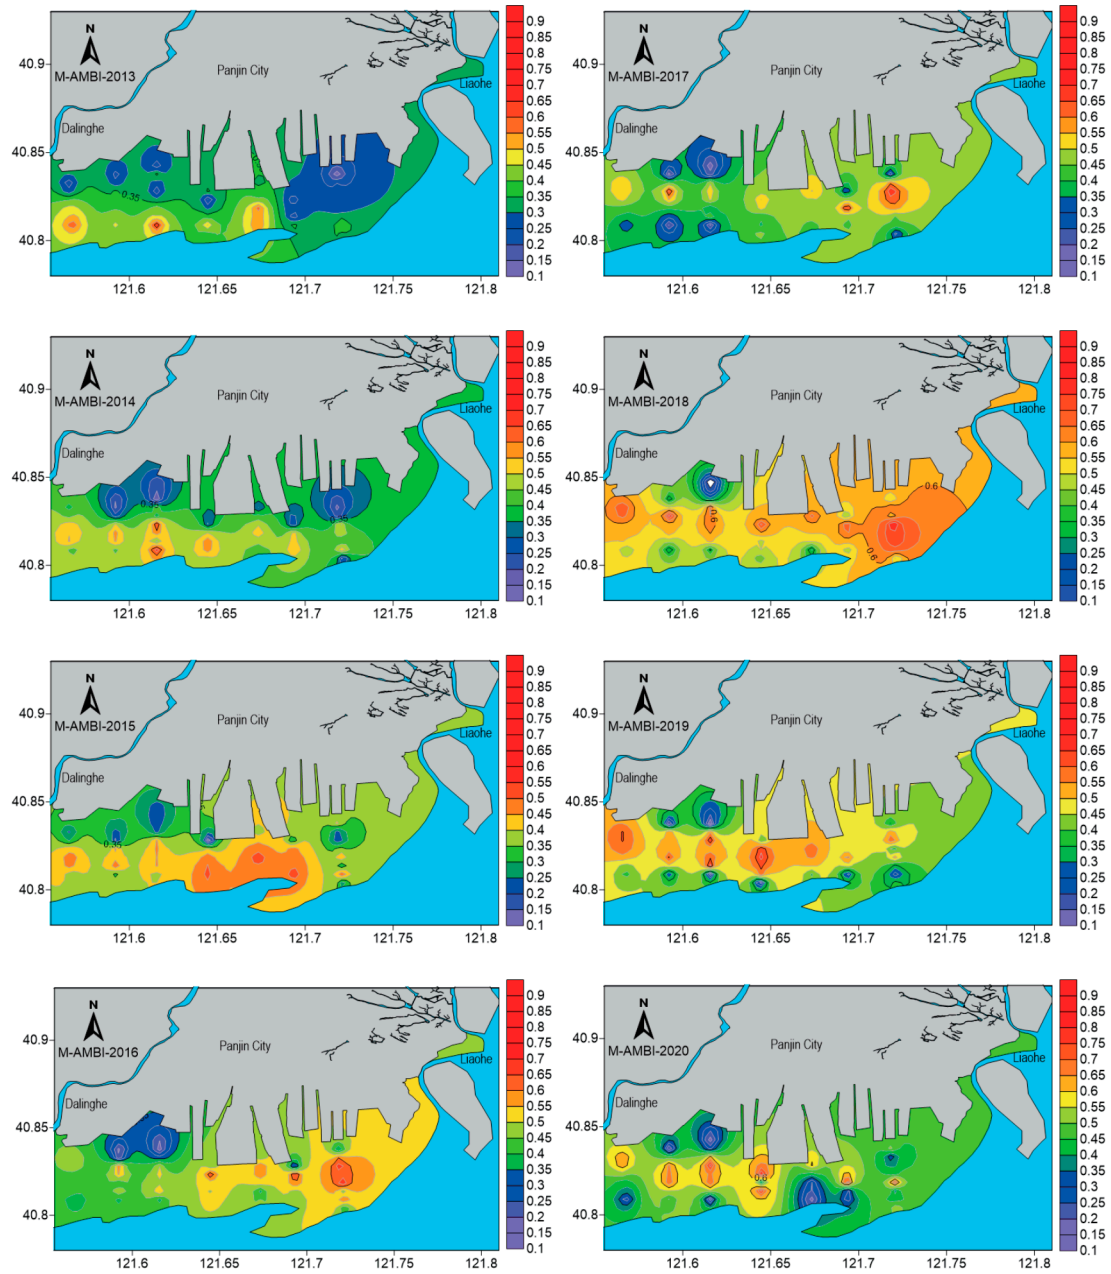

Figure S3. Spatial distribution maps of the M-AMBI values of the intertidal flats in Liaohé Estuary from 2013 to 2020
